# Supplementary material
Source: Research Square preprint supplement (doi:10.21203/rs.3.rs-9593605/v1)
Supplement: Supplementary file 2 [file 5c6ac2454c77a5156254d1cb.docx]

**Table 1** Codes identified in the VR Memory data

| **Code** | **Description** |
| --- | --- |
| *Learning and comprehension of the task* | |
| Uncertainty or confusion | Confusion or uncertainty about what needs to be done, how to proceed, or regarding instructions. |
| Difficulty remembering or following instructions | Hard to remember and follow instructions; Instructions need to be repeated. |
| On-screen instructions were helpful | Participants found the instructions at the side of the screen helpful. |
| Learning the task was easy | Learning to do the task was easy, requiring minimal time, effort, or cognitive burden. |
| Steep learning curve | Learning to do the tasks was difficult and required excessive time and effort. |
| Exposure helped task comprehension | After spending some time in the virtual environment, participants became more familiar with the task. |
| The task was easy | The task was easy and not challenging or complex, which some participants perceived as a negative aspect. |
| The task was difficult | The task was difficult in terms of comprehension and execution; participants required assistance. |
| The task had moderate difficulty | The system was perceived as neither easy nor difficult, but somewhere in the middle. |
| Not interested in this type of task | Participants were not interested or committed in this task; it was not something they preferred or liked to do. |
| *Hardware problems and attitudes towards VR technology* | |
| Problems using the hardware | The hardware was not used correctly or to its full capacity (e.g., using head tracking), and body movements and positions were often strange, unnatural, and uncomfortable. |
| Positive attitude towards using this technology in the future | Interested in using this or a similar system in the future; Views on this technology has become more positive. |
| Novel experience | Participants were in awe of the novelty of the hardware and the experiences it offered. |
| *User experience with the environment* | |
| Environment elicited positive emotions | Environmental elements (e.g., items, graphics, colours) elicited positive emotions such as happiness and nostalgia. |
| Environmental elements had negative effects | Virtual environment elements caused frustration or hindered performance. |
| The environment was not experienced as real | The virtual environment was perceived as fake and unrealistic. |
| The environment was experienced as real | The virtual environment felt real, like a place that had been visited, creating a sense of presence. |
| Quality of the environment was low | The quality of the graphics or system was low. |
| Negative experience | Negative experiences and emotions, expressions of dissatisfaction, tolerance of the task, and overall dislike of the task. |
| Neutral or positive experience | Overall, liked the experience, finding it interesting, novel, and not bothersome. |
| *Health, psychological, and cognitive impact* | |
| Anxiety | Anxiety due to perception of virtual sounds as real. |
| No adverse health effects | There were no adverse effects on physiological or psychological health, such as stress, tiredness, or anxiety. |
| Encouraged mental stimulation | Pushed to engage their mental abilities more, had to use more brainpower. |
| Negative perception of own abilities | Self-doubt regarding the ability to complete the task; fear of poor performance; disappointment in one's own performance; insecurity. |
| Feeling autonomous and confident | Feeling capable of doing it independently. |
| Improved self-esteem and self-efficacy | Initial perceptions of incompetence transformed into feelings of self-efficacy and confidence in their own abilities. Participants felt positive about themselves after completing the task or using the system, finding the completion of objectives to be a rewarding experience. |
| Perceiving it as a game to regulate emotions | Perceived the experience as a game to avoid negative feelings about their performance. |
| *Cognitive limitations due to dementia* | |
| Inconsistency of answers | Answers contradict previous statements or observations; inconsistency in the reported experience; uncertainty while answering questions. |
| Low focus and attention | Participants' attention and comprehension abilities may hinder their performance; Tendency to forget instructions or objectives. |
| Virtual environment noises are perceived as real | Participants perceived the noises from the virtual environment as real, often searching for the sources of these noises in the room. |

**Table 2** Themes and codes identified from the VR Attention data

| **Code** | **Description** |
| --- | --- |
| *Learning and comprehension of the task* | |
| Uncertainty or confusion | Confusion or uncertainty about what needs to be done, how to proceed, or regarding instructions. |
| Difficulty remembering or following instructions | Hard to remember and follow instructions; Instructions need to be repeated. |
| Learning the task was easy | Learning to do the task was easy, requiring minimal time, effort, or cognitive burden. |
| Steep learning curve | Learning to do the tasks was difficult and required excessive time and effort; Required a lot of learning. |
| Exposure helped task comprehension | After spending some time in the virtual environment, participants became more familiar with the task. |
| The task was easy | The task was easy and not challenging or complex, which some participants perceived as a negative aspect. |
| The task was difficult | The task was difficult in terms of comprehension and execution; participants required assistance. |
| The speed of the birds and the pace of the task was not fast so users could keep up | The pace of the task was considered appropriate, neither too fast nor too slow. |
| Familiarity with task | The task was familiar, resembling activities they had done in the past or ones they enjoyed doing. |
| *Hardware problems and attitudes towards VR technology* | |
| Problems using the hardware | The hardware was not used correctly or to its full capacity (e.g., using head tracking), and body movements and positions were often strange, unnatural, and uncomfortable. |
| Immersive technology | Experience of immersion due to the technology, such as feeling surrounded or fully immersed in the environment. |
| Equipment had to be endured | The equipment was uncomfortable and had to be endured. |
| Positive attitude towards using this technology in the future | Interested in using this or a similar system in the future; Views on this technology has become more positive. |
| Novel experience | Participants were in awe of the novelty of the hardware and the experiences it offered. |
| *User experience with the environment* | |
| Environment elicited positive emotions | Environmental elements (e.g., items, graphics, colours) elicited positive emotions such as happiness and nostalgia. |
| Environmental elements had negative effects | Virtual environment elements caused frustration or hindered performance. |
| The environment was not experienced as real | The virtual environment was perceived as fake and unrealistic. |
| The environment was experienced as real | The virtual environment felt real, like a place that had been visited, creating a sense of presence. |
| Quality of the environment was low | The quality of the graphics or system was low. |
| Did not meet expectations | Expectations for how the system should work or the overall experience were not met; Had higher hopes that were not fulfilled. |
| Negative experience | Negative experiences and emotions, expressions of dissatisfaction, tolerance of the task, and overall dislike of the task. |
| Neutral or positive experience | Overall, liked the experience, finding it interesting, novel, and not bothersome. |
| *Health, psychological, and cognitive impact* | |
| Negative effects on health | Physiological or psychological health issues, including fatigue, headache, symptoms of cybersickness, nausea, tiredness, and eyestrain, emerged after exposure to the virtual environment. |
| No adverse health effects | There were no adverse effects on physiological or psychological health, such as stress, tiredness, or anxiety. |
| Encouraged mental stimulation | Pushed to engage their mental abilities more, had to use more brainpower. |
| Perceiving it as a game to regulate emotions | Perceived the experience as a game to avoid negative feelings about their performance. |
| Feeling autonomous | Feeling capable of doing it independently. |
| Improved self-esteem and self-efficacy | Initial perceptions of incompetence transformed into feelings of self-efficacy and confidence in their own abilities. Participants felt positive about themselves after completing the task or using the system, finding the completion of objectives to be a rewarding experience. |
| Negative perception of own abilities | Self-doubt regarding the ability to complete the task; fear of poor performance; disappointment in one's own performance; insecurity. |
| *Cognitive limitations due to dementia* | |
| Low focus and attention | Participants' attention and comprehension abilities may hinder their performance; Tendency to forget instructions or objectives. |
| Inconsistency of answers | Answers contradict previous statements or observations; inconsistency in the reported experience; uncertainty while answering questions. |
