# Supplementary material
Source: Research Square preprint supplement (doi:10.21203/rs.3.rs-9593605/v1)
Supplement: Supplementary file 3 [file cae398be98e975ac6eb9a00e.docx]

**Table 1** Studies assessing feasibility and usability of VR applications in people with dementia and MCI

| **Study** | **Condition** | **Type of dementia / cognitive status** | **Global cognitive assessment** | **N** | **m** | **Age** | **Presence** | **Cybersickness** | **Task** | **Type of VR** | **Main findings** |
| --- | --- | --- | --- | --- | --- | --- | --- | --- | --- | --- | --- |
| Afifi et al. (2021) | MCI, dementia | Mild-to-moderate dementia | CDR 0.5 | 21 | 3 | 83.10 (9.76) | Yes; presence, social presence, and co-presence based on Nowak and Biocca (2003) | One item based on Maani et al. (2011) | Passive viewing of scenery and reminiscence tasks. | Immersive CAVE with controller, movement platform, and 3D glasses | Conversational and behavioural engagement increased during VR sessions. Behavioural engagement varied by cognitive impairment level, whereas psychological and emotional engagement remained high. VR was safe and highly acceptable, with no significant side effects. Greater immersion was reported by participants with dementia than by those with MCI, whereas participants with MCI showed more kinetic engagement. |
| Alizai et al. (2025) | MCI | n.s. | Self-reported; Clinical Frailty Scale | 14 | 7 | 71.6 viewer; 53.9 navigator | No | Yes; three participants (21.4%) experienced mild cybersickness, including dizziness and nausea, under specific conditions such as quick head movements or fast-moving content | Participants provided input about content they were interested in viewing, looked around in all directions while viewing 360° content, including above, below, and behind, and voiced their observations, feelings, and feedback aloud. | Viewer: immersive HMD; navigator: non-immersive tablet | Themes included headset comfort and safety, usability and navigation, quality, including video, audio, and connectivity, and content. The platform supported socialisation and bonding between older adults and caregivers and received positive feedback. The findings indicated a need to improve the application’s audio quality, streamline navigation, and enlarge interface elements for easier use. |
| Appel et al. (2020) | N/A | n.s. | MoCA 21–26 | 66 | 26 | 80.5 (10.5) | No; custom questionnaire assessed enjoyment, engagement, and immersion | No; authors reported no adverse effects | Viewing VR videos of rural and nature scenes. | Immersive HMD with motion control | Feedback was positive, with high enjoyment and tolerability. Most participants expressed a desire to use VR again. No considerable adverse side effects were reported. Some fatigue and loneliness occurred after the intervention. Fitting the HMD over eyeglasses was problematic for many participants. More positive emotions and physical movement were observed after the intervention. Participants preferred mildly stimulating and calming nature scenes, as well as more dynamic, social, and familiar real-world scenes. |
| Arlati et al. (2021) | MCI, SCD | Not applicable; participants had objective cognitive decline/MCI or subjective cognitive decline | CDR 2–3 | 24 | 11 | 72.45 (5.83) | ITC-SOPI | SSQ | Shopping task in a virtual supermarket, including buying groceries from a list and paying at the counter. Participants completed the task while standing. | Immersive HMD with controllers | VR was enjoyable for older adults. Some risky behaviours were observed, including one participant falling while attempting to lean on a virtual shelf. Participants with MCI made more errors. Errors correlated with computer anxiety and reduced control. VR was well accepted and highly engaging, with negligible side effects and no SSQ differences between groups. Presence levels were good. Findings may have been influenced by sex in the SCD group, with higher scores for males. No age- or cognition-related negative attitudes towards technology were found. Participants with MCI reported greater perceived ease of control and enjoyment when cognitive symptoms were less severe. Higher education correlated with better performance and fewer errors in the SCD group. |
| Burdea et al. (2015) | Dementia | Unspecified dementia (2) | n.s. | 10 | 7 | 63.40 (6.04) | No | No | Interactive serious games targeting attention, including concentration, short-term memory, and dual tasking; memory recall; executive functioning; and emotional wellbeing. Tasks automatically adapted to each participant’s level of motor functioning and involved arm movements to destroy crates, fly kites, play drums, play and remember cards, and move balls. | Non-immersive with controller | Improvements were reported in decision-making and executive functioning, with trends towards improvement in depression and processing speed. VR was feasible and associated with high satisfaction and engagement. Some usability issues occurred, including difficulty with HMD weight and visual acuity control. No significant negative effects were reported. Emotional improvements were observed. Three participants experienced slight increases in depression scores after the intervention. |
| Coelho et al. (2020) | Dementia | AD | MoCA M = 7.20, SD = 5.30; GDS 4–6 | 9 | 3 | 85.60 (7.40) | No | SSQ | Viewing 360° reminiscence videos. | Immersive HMD | Participants showed positive engagement and high satisfaction. VR was feasible, safe, immersive, motivating, and engaging despite its difficulty. Simulator sickness symptoms were minimal. |
| Flynn et al. (2003) | Dementia | Mild-to-moderate dementia; AD, mixed dementia, vascular dementia, primary progressive aphasia, and organic brain syndrome | MMSE = 12 for one participant only | 6 | 3 | 52–91 | Yes; modified version of VRUse (Kalawsky, 1999) | Yes; modified version of SSQ | Navigating a park. | Semi-immersive with controller | VR was feasible and supported realistic object perception, ease of use, sense of control, and enjoyment. No significant adverse effects or reduction in psychological wellbeing were reported. Participants had little difficulty understanding and responding to questionnaire items. Participants experienced presence in the virtual environment, perceiving it as realistic and feeling in control of their interactions. Carer involvement provided social support, reduced anxiety, and enhanced motivation. Some participants paused the task to answer presence items, indicating divided attention during interaction. A slight increase in heart rate was observed, possibly due to situational anxiety or the physical effort of operating the controller. |
| Goodall et al. (2021) | Dementia | Moderate-to-severe dementia; AD, vascular dementia, Parkinson’s disease, Lewy bodies and Parkinson’s disease, and alcohol-related dementia | n.s. | 12 | n.s. | 84.1 (8.93) | No | No | Exergames, film watching, family photographs, touchscreen activities, and memory and sensory tasks. | Semi-immersive | VR stimulated emotional experiences, preserved a sense of narrative identity, and improved interpersonal relationships at familial and professional levels. Music prompted meaningful interactions, with patients expressing their identities through dancing and singing. This was important for individuals with advanced dementia who may have difficulty with verbal communication. |
| Hassandra et al. (2021) | MCI | n.s. | MMSE M = 26.63, SD = 1.85 | 27 | 8 | 73.22 (9.26) | No | No; authors reported no adverse effects | Exergame involving cycling and cognitive tasks involving numerical calculations. | Immersive HMD | Usability was good, with minimal adverse effects and 93% tolerability. Enjoyment and intention to use VR again were high. The system was perceived as attractive and interesting, regardless of whether users were innovation-seeking. |
| Kim et al. (2021) | Dementia | Moderate to severe | MMSE-K M = 21.44, SD = 4.59 | 10 | 0 | 85.80 (3.26) | One item assessed by a researcher | Yes/no assessment by a researcher | Viewing 360° videos. Environments targeted different psychological needs and included looking at and listening to natural scenes, boarding a train, drinking tea, playing with puppies, viewing family photographs, and walking through orchards. | Immersive HMD with motion control | VR was feasible and safe and helped participants recall the past. Satisfaction and immersion were high. The system was considered safe and convenient. Usability issues included HMD weight, visual acuity control, and hand-movement capture. Satisfaction of psychological needs reduced anxiety and behavioural psychological symptoms. Cybersickness was reported by two participants. |
| Lau et al. (2025) | NA | Vascular | NA | 101 | 53 | 40–80+ | No | No | Interactive Hong Kong scenery environments. Scene I included the rickshaw and the Kowloon-Canton Railway Terminus in Tsim Sha Tsui. Scene II included nostalgic posters associated with martial arts and old Hong Kong movies, and the Kowloon-Canton Railway Terminus in Tsim Sha Tsui. Scene III included posters and magazines related to Cantonese pop and the mobile soft-ice-cream truck. | Immersive HMD | The proof-of-concept VR-based reminiscence therapy received overall positive feedback, and the VR content produced a sense of familiarity. |
| Maeng et al. (2021) | MCI | n.s. | CERAD, MMSE, MoCA, CPS; severe to normal cognition; unknown (6) | 31 | 8 | 73.2 (7.3) | Yes; modified 18-item scale based on Witmer and Singer (1998) and Lombard et al. (2019) | SSQ | Training tasks targeted memory, attention, and executive function. Participants memorised a list and purchased goods in a supermarket. Tasks were completed standing, except for one participant using a wheelchair. Difficulty levels varied according to performance. | Semi-immersive | Cognitive improvement was reported. Some cybersickness symptoms occurred, mainly disorientation. High dropout rates were noted because of dizziness and discomfort during the initial sessions. Discomfort reduced over time. Standing may have increased discomfort. Participants experienced presence. No difference was found compared with the normative group. |
| Manera et al. (2016b) | MCI, dementia | AD; n.s. | MMSE 18–28; MCI: M = 25.40, SD = 2.60; dementia: M = 20.20, SD = 3.10. CDR 0.00–11.00; MCI: M = 1.40, SD = 1.50; dementia: M = 4.80, SD = 3.10 | 60 | 35 | MCI: 75.00 (6.70); dementia: 76.30 (7.20) | No | No | Selective and sustained attention tasks requiring participants to find and select targets surrounded by distractors, based on colour and pattern. | Immersive projector with stereoscopic glasses | VR was highly satisfactory, safe, and associated with low discomfort, anxiety, and fatigue. The VR condition was perceived as more immersive, engaging, and motivating by 70% of participants, despite being more challenging. Nine of 12 participants continued using VR after the experiment. Apathetic participants showed as much interest as non-apathetic participants and displayed a stronger preference for VR. Lower performance was attributed to difficulty using a mouse, eye strain from 3D glasses, and unfamiliarity with VR. |
| McEwen et al. (2014) | Dementia | Frontotemporal dementia | MoCA = 12 | 1 | 1 | 78 | No | No; observations were made | Series of exergames completed while wearing a physiotherapy belt for safety. | Semi-immersive with green-screen technology | VR was feasible, safe, and enjoyable. Enjoyment appeared to motivate increased participation in activities at home. No significant objective improvements in balance or mobility were observed after the intervention. Improvement at 1-month follow-up may have been due to motivation to complete exercises at home. Performance improved and the need for instructions decreased. Frequent lapses in concentration and occasional forgetting of how to play the games created challenges in progressing game difficulty. No significant adverse effects were reported. |
| Mendez et al. (2015) | Dementia | Mild-to-moderately severe AD, Huntington’s disease, mixed cortical and subcortical vascular dementia, and frontotemporal dementia | MMSE M = 21.30, SD = 7.30; CDR 1.0 | 5 | 2 | 56.00 (12.80) | No; observations were made | No; observations were made | Participants sat at a table with avatars and answered their questions. Questions comprised a subset of the UCLA Insight Interview. | Immersive HMD | VR interviews were comparable to real-world interviews, and presence was observed in the VR environment. VR was feasible and well tolerated. No significant changes in stress ratings or adverse effects were reported. Presence was demonstrated through head movements towards avatars during interactions. Patients showed greater interaction and more elaborate comments in VR than in real-life evaluations, possibly because they were unable to critically analyse the experience due to impairments in brain regions involved in critical appraisal and impulse control. |
| Moyle et al. (2018) | Dementia | Moderate to severe AD; n.s. (3) | PAS 7.35–20; M = 13.21; SD undisclosed | 10 | 3 | 89 (4.97) | No | No | Passive viewing of rural scenery. | Custom-made hand-motion tracking | Positive effects on engagement, apathy, and mood. Pleasure and alertness increased. Fear/anxiety was higher than in the normative sample. |
| Orr et al. (2021) | Dementia | n.s. | n.s. | 10 | 4 | n.s. | No; assessed qualitatively | No | Viewing 360° videos of natural scenery. | Immersive HMD | VR was feasible for assessing navigation and functional behaviour. Immersive environments were feasible. No significant deterioration in wellbeing was reported. |
| Riaz et al. (2021) | MCI, dementia | Mild dementia | MMSE | 8 | 2 | 68.29 (6.52) | No | VRSQ | Tasks targeted registration, short-term memory, attention, alertness, orientation to time and space, working memory, visuospatial navigation, motor coordination, and executive functioning, including abstraction, calculation, and decision-making. Participants moved freely through three environments: the Great Wall of China, the Grand Mosque in Mecca, and the Pyramids of Egypt, completing cognitive tasks. | Immersive HMD | Cognitive function stabilised, with a trend towards improved mental wellbeing. VR was well tolerated. VRSQ scores decreased significantly over time. Caregivers observed improvements in behaviour and motivation. |
| Rose et al. (2018) | Dementia | Mild to moderate | GDS 2–6 | 8 | 6 | 69.63 | Interview questions based on Nichols et al. (2000) | No | Viewing 360° videos. | Immersive HMD | VR was feasible and had a positive impact, with significant improvements in pleasure and alertness from before to after HMD-VR exposure. Most participants requested more time with VR. Emotional responses, physical and cognitive effects, and memory evocation were highlighted as significant aspects. Caregivers expressed initial preconceptions about whether patients would accept unfamiliar technology, which became more positive after exposure. No significant adverse effects were reported. |
| Shin et al. (2023b) | Dementia | Vascular dementia, AD, and frontotemporal dementia | K-MMSE M = 22.86, SD = 3.18; GDS 3–5 | 7 | 5 | 71 (8.89) | Yes; nine custom questions | SSQ | Interactive 360° video. I-ADL training programme involving cleaning, grocery shopping, cooking, going to hospital, and ordering food. | Immersive HMD with controller | Improvements were reported in activities of daily living, cognitive functioning, and mood. Satisfaction and immersion were high. Side effects were negligible, with one moderate effect that subsided over time. I-ADL improved significantly, helping participants maintain independence in daily life. Case 2 showed particularly significant improvements in I-ADL and BDI scores, possibly because of younger age and a higher initial MMSE score. Improvement was observed in executive functioning. Some participants were unable to complete certain cognitive tests because of cognitive decline. |
| Siriaraya and Ang (2014) | Dementia | n.s. | n.s. | 20 | n.s. | 80–101 | Yes | No | Different prototype iterations involving walking on a path, rowing on a river, and gardening. | Semi-immersive with gesture and hand-motion interaction | The system was feasible and enhanced sense of self. Some instances of fear and anxiety occurred. Continuous use caused fatigue, particularly among those with mobility issues. Some virtual environments triggered negative memories. Some care staff were keen to try the technology, whereas others perceived it as adding to workload. Individuals with severe cognitive decline had difficulty interacting with the prototypes and required physical guidance from caregivers. Participants felt more empowered after interacting with the system. |
| Tuena et al. (2023) | MCI | n.s. | MMSE 13–26 | 8 | 6 | 72.75 (5.56) | ITC-SOPI | Yes | Encoding and recalling landmark positions. | Immersive HMD with motion control | Participants reported a moderate sense of spatial presence. More practice was needed with the foot-motion pad. Negative effects were limited. Usability was acceptable, including for inexperienced users. |
| Yun et al. (2020) | MCI, dementia | Mild dementia | MMSE 23–28; CDR 0.5–1 | 11 | 5 | 72.64 (4.65) | No | No | Harvesting and cooking game targeting sustained, alternating, and selective attention; working memory; spatial and procedural memory; and executive function. | Immersive HMD | Feasible and usable, with positive satisfaction and willingness to use. No cybersickness was reported. |

Note. AD = Alzheimer’s disease; BDI = Beck Depression Inventory; CAVE = cave automatic virtual environment; CDR = Clinical Dementia Rating; CERAD = Consortium to Establish a Registry for Alzheimer’s Disease; CPS = Cognitive Performance Scale; GDS = Global Deterioration Scale; HMD = head-mounted display; I-ADL = instrumental activities of daily living; ITC-SOPI = Independent Television Commission Sense of Presence Inventory; K-MMSE = Korean Mini-Mental State Examination; M = mean; MCI = mild cognitive impairment; MMSE = Mini-Mental State Examination; MoCA = Montreal Cognitive Assessment; N = total sample size; m = number of male participants; n.s. = not specified; PAS = Psychogeriatric Assessment Scale; SCD = subjective cognitive decline; SD = standard deviation; SSQ = Simulator Sickness Questionnaire; VE = virtual environment; VR = virtual reality; VR-RT = virtual reality-based reminiscence therapy; VRSQ = Virtual Reality Sickness Questionnaire.
