# Supplementary material
Source: Research Square preprint supplement (doi:10.21203/rs.3.rs-9593605/v1)
Supplement: Supplementary file 4 [file e1c3a416d90f6d8f849b9014.docx]

**Fig. 1** The 5-point pictorial response format


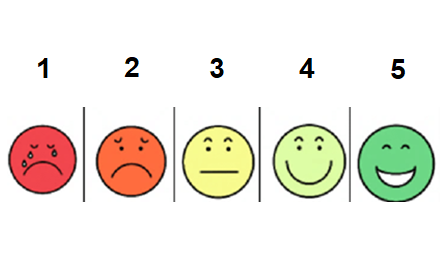


**Fig. 2** The 7-point pictorial response format


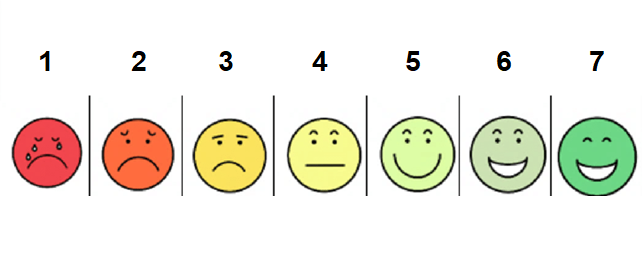


**Open questions**

- How would you describe your overall experience?
- What did you like the most about doing this task?
- What did you like the least?
- What, if anything, surprised you about the experience?
- What, if anything, caused you frustration?
